# Supplementary material for: Risk of emergency hospital admission in children associated with mental disorders and alcohol misuse in the household: an electronic birth cohort study
Source: PubMed Central journal article supplement (PMC5990492; doi:10.1016/s2468-2667(18)30069-0), 2018-06-05
Supplement: mmc1.pdf [file mmc1.pdf]

# THE LANCET

## Public Health

### **Supplementary appendix**

This appendix formed part of the original submission and has been peer reviewed. We post it as supplied by the authors.

Supplement to: Paranjothy S, Evans A, Bandyopadhyay A, et al. Risk of emergency hospital admission in children associated with mental disorders and alcohol misuse in the household: an electronic birth cohort study. *Lancet Public Health* 2018; published online May 15. [http://dx.doi.org/10.1016/S2468-2667\(18\)30069-0](http://dx.doi.org/10.1016/S2468-2667(18)30069-0).

## Appendix: Supplementary tables

### Supplementary table 1: WECC Data sources

#### Data source

Public Health Birth files from the Office for National Statistics (ONSB) - from 2003

National Community Child Health Database (NCCHD) - from 1987

Public Health Mortality Files from the Office for National Statistics (ONSM) - from 2002

Patient Episode Dataset for Wales (PEDW) - from 1998

All Wales Perinatal Survey (AWPS) -from 1993

Congenital Anomaly Register and Information Service (CARIS) - from 1998

#### Description

Data on all births in Wales or to mothers who are usually resident in Wales

A national database of all children resident in Wales or born in a Welsh hospital, containing data collected at birth such as parity, mode of delivery, gestation, birth weight, gender, breastfeeding, and Apgar Score

Data on all deaths in Wales or of individuals who are usually resident in Wales

Demographic and clinical data on all inpatient and day-case admissions in National Health Service Wales hospitals and all Welsh residents treated in other UK countries

A database of perinatal and infant mortality in Wales including infants from 20 weeks' gestation to 1 year of age, who die in a Welsh hospital or whose mother is usually resident in Wales

A population-based register of any foetus or infant who has a congenital anomaly whose mother is usually resident in Wales at the time of birth; congenital anomalies are defined by the European network of population-based registries for the epidemiologic surveillance of congenital anomalies

Supplementary figure 1: Direct Acyclic Graph to inform variable selection

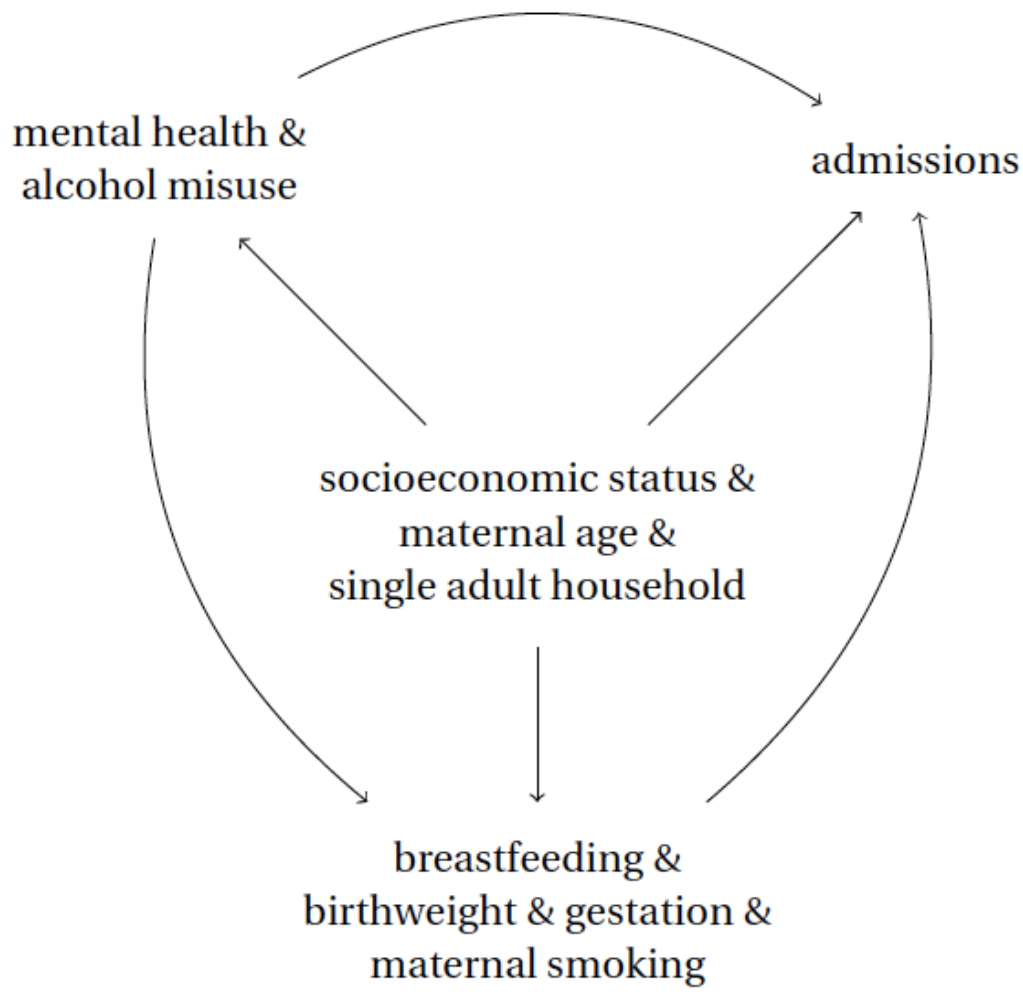

**Supplementary table 2: Social-demographic data for Wales**

|                                                                                     | <b>Total</b> |            |
|-------------------------------------------------------------------------------------|--------------|------------|
|                                                                                     | <b>n</b>     | <b>(%)</b> |
| Townsend Deprivation quintile: from 2003, child's age 0 – 14 years old <sup>a</sup> |              |            |
| 1 - least deprived                                                                  | -            | (19.3)     |
| 2                                                                                   | -            | (19.3)     |
| 3                                                                                   | -            | (19.3)     |
| 4                                                                                   | -            | (20.5)     |
| 5 - most deprived                                                                   | -            | (21.7)     |
| Sex: from 2001, child's age 0 – 14 years old <sup>b</sup>                           |              |            |
| Male                                                                                | 281767       | (51.3)     |
| Female                                                                              | 267437       | (48.7)     |
| Breastfeeding at birth: Welsh residents 2011 <sup>c</sup>                           |              |            |
| No                                                                                  | 14469        | (40.5)     |
| Yes                                                                                 | 18062        | (50.6)     |
| no answer                                                                           | 3151         | (8.8)      |
| Maternal age at childbirth: Welsh residents 2011 <sup>c</sup>                       |              |            |
| <16                                                                                 | 57           | (0.2)      |
| 16-19                                                                               | 2409         | (6.8)      |
| 19-24                                                                               | 8115         | (22.7)     |
| 25-29 years                                                                         | 10268        | (28.8)     |
| 30-34                                                                               | 9107         | (25.5)     |
| 35+                                                                                 | 5722         | (16.0)     |
| no answer                                                                           | 4            | (0.01)     |
| Gestational age at birth: Welsh residents 2011 <sup>c</sup>                         |              |            |
| 20-<32 weeks                                                                        | 443          | (1.2)      |
| 32-<37 weeks                                                                        | 2094         | (5.9)      |
| 37-43 weeks                                                                         | 32985        | (92.4)     |
| no answer                                                                           | 160          | (0.4)      |
| Birthweight: Welsh residents 2011 <sup>c</sup>                                      |              |            |
| Low: < 2500g                                                                        | 2403         | (6.7)      |
| Normal: ≥ 2500 - < 4000g                                                            | 28991        | (81.2)     |
| High: ≥ 4000g                                                                       | 4249         | (11.9)     |
| no answer                                                                           | 39           | (0.1)      |

<sup>a</sup> Deprivation and health – report for the National Public Health Service for Wales 2004; <sup>b</sup> Welsh data from the UK Census 2001 at <https://stats.wales.gov.wales/>; <sup>c</sup> Births in Wales 2001 - 2011: Data from the National Community Child Health Database 2012.

**Supplementary table 3: Complete case regression results from Cox models for time to first emergency hospital admission**

|                                                                                                        | First all-cause emergency hospital admission |             | First injury or external cause emergency hospital admission |             | First child victimisation hospital admission |             |
|--------------------------------------------------------------------------------------------------------|----------------------------------------------|-------------|-------------------------------------------------------------|-------------|----------------------------------------------|-------------|
|                                                                                                        | Multivariable <sup>a</sup>                   |             | Multivariable <sup>a</sup>                                  |             | Multivariable <sup>a</sup>                   |             |
|                                                                                                        | HR <sup>b</sup>                              | 95% CI      | HR <sup>b</sup>                                             | 95% CI      | HR <sup>b</sup>                              | 95% CI      |
| N=78,207                                                                                               |                                              |             |                                                             |             |                                              |             |
| Household member ehad a common mental disorder /psychosis                                              |                                              |             |                                                             |             |                                              |             |
| GP code: for child pre-birth - 12 years.                                                               |                                              |             |                                                             |             |                                              |             |
| No                                                                                                     | 1.00                                         |             | 1.00                                                        |             | 1.00                                         |             |
| Yes                                                                                                    | 1.14                                         | (1.11-1.17) | 1.15                                                        | (1.09-1.21) | 1.16                                         | (1.00-1.35) |
| Ever in a single parent household: for child from birth - 12 years.                                    |                                              |             |                                                             |             |                                              |             |
| No                                                                                                     | 1.00                                         |             | 1.00                                                        |             | 1.00                                         |             |
| Yes                                                                                                    | 1.02                                         | (1.00-1.04) | 1.09                                                        | (1.03-1.15) | 1.08                                         | (0.93-1.26) |
| Ever any household member with an alcohol-related hospital admission: for child from birth - 12 years. |                                              |             |                                                             |             |                                              |             |
| No                                                                                                     | 1.00                                         |             | 1.00                                                        |             | 1.00                                         |             |
| Yes                                                                                                    | 0.91                                         | (0.77-1.06) | 1.02                                                        | (0.82-1.27) | 0.56                                         | (0.18-1.76) |
| Townsend deprivation quintile at birth / first 4 months                                                |                                              |             |                                                             |             |                                              |             |
| 1 - least deprived                                                                                     | 1.00                                         |             | 1.00                                                        |             | 1.00                                         |             |
| 2                                                                                                      | 0.99                                         | (0.96-1.03) | 1.10                                                        | (1.00-1.21) | 1.14                                         | (0.89-1.47) |
| 3                                                                                                      | 1.05                                         | (1.01-1.08) | 1.24                                                        | (1.14-1.36) | 0.93                                         | (0.72-1.19) |
| 4                                                                                                      | 1.08                                         | (1.04-1.12) | 1.23                                                        | (1.12-1.34) | 0.95                                         | (0.74-1.22) |
| 5 - Most deprived                                                                                      | 1.09                                         | (1.05-1.13) | 1.32                                                        | (1.21-1.45) | 1.23                                         | (0.96-1.57) |
| Sex                                                                                                    |                                              |             |                                                             |             |                                              |             |
| Male                                                                                                   | 1.00                                         |             | 1.00                                                        |             | 1.00                                         |             |
| Female                                                                                                 | 0.82                                         | (0.81-0.84) | 0.82                                                        | (0.78-0.86) | 0.87                                         | (0.76-1.00) |
| Maternal age at childbirth                                                                             |                                              |             |                                                             |             |                                              |             |
| <18                                                                                                    | 1.24                                         | (1.16-1.32) | 1.70                                                        | (1.49-1.94) | 1.77                                         | (1.26-2.48) |
| 18-24                                                                                                  | 1.14                                         | (1.11-1.18) | 1.28                                                        | (1.20-1.37) | 1.28                                         | (1.07-1.52) |
| 25-29 years old                                                                                        | 1.00                                         |             | 1.00                                                        |             | 1.00                                         |             |
| 30-34                                                                                                  | 0.92                                         | (0.89-0.94) | 0.92                                                        | (0.85-0.98) | 0.84                                         | (0.69-1.03) |
| 35+                                                                                                    | 0.87                                         | (0.84-0.90) | 0.90                                                        | (0.83-0.98) | 0.86                                         | (0.68-1.09) |
| Gestational age at birth                                                                               |                                              |             |                                                             |             |                                              |             |
| 24 - < 28 weeks: extremely preterm                                                                     | 3.16                                         | (2.53-3.95) | 0.54                                                        | (0.22-1.29) | 0.90                                         | (0.13-6.42) |
| 28 - < 33 weeks: v preterm                                                                             | 1.90                                         | (1.74-2.07) | 1.09                                                        | (0.86-1.37) | 2.42                                         | (1.56-3.75) |
| 33 - < 37 weeks: moderately preterm                                                                    | 1.44                                         | (1.38-1.50) | 1.00                                                        | (0.89-1.11) | 1.57                                         | (1.23-2.02) |
| 37+ weeks: term                                                                                        | 1.00                                         |             | 1.00                                                        |             | 1.00                                         |             |
| Small for gestational age (<10th centile for gestation and gender-specific birthweight)                |                                              |             |                                                             |             |                                              |             |
| No                                                                                                     | 1.00                                         |             | 1.00                                                        |             | 1.00                                         |             |
| Yes                                                                                                    | 1.09                                         | (1.05-1.12) | 1.03                                                        | (0.95-1.11) | 1.35                                         | (1.12-1.63) |
| Breastfeeding at birth / 6-8 weeks                                                                     |                                              |             |                                                             |             |                                              |             |
| No                                                                                                     | 1.00                                         |             | 1.00                                                        |             | 1.00                                         |             |
| Yes                                                                                                    | 0.94                                         | (0.92-0.96) | 1.02                                                        | (0.97-1.08) | 1.12                                         | (0.98-1.29) |
| Parity                                                                                                 |                                              |             |                                                             |             |                                              |             |
| No                                                                                                     | 1.00                                         |             | 1.00                                                        |             | 1.00                                         |             |
| Yes                                                                                                    | 0.96                                         | (0.94-0.98) | 1.16                                                        | (1.10-1.22) | 1.10                                         | (0.95-1.27) |
| Multiple births (e.g. twins)                                                                           |                                              |             |                                                             |             |                                              |             |
| No/no answer                                                                                           | 1.00                                         |             | 1.00                                                        |             | 1.00                                         |             |
| Yes                                                                                                    | 0.89                                         | (0.84-0.95) | 1.04                                                        | (0.89-1.22) | 0.57                                         | (0.35-0.94) |
| Congenital anomalies                                                                                   |                                              |             |                                                             |             |                                              |             |
| None                                                                                                   | 1.00                                         |             | 1.00                                                        |             | 1.00                                         |             |
| Major/minor                                                                                            | 1.91                                         | (1.82-2.00) | 1.22                                                        | (1.09-1.37) | 1.95                                         | (1.52-2.51) |
| Maternal cigarette smoking at booking in                                                               |                                              |             |                                                             |             |                                              |             |
| No                                                                                                     | 1.00                                         |             | 1.00                                                        |             | 1.00                                         |             |
| Yes                                                                                                    | 1.06                                         | (1.04-1.09) | 1.13                                                        | (1.07-1.20) | 2.18                                         | (1.89-2.52) |

<sup>a</sup> adjusted for all variables in the model; <sup>b</sup> hazard ratio.

**Supplementary table 4: Timing of exposure and risk of emergency hospital admission**

|                                                                          | First all-cause<br>emergency hospital<br>admission |             |
|--------------------------------------------------------------------------|----------------------------------------------------|-------------|
|                                                                          | Multivariable <sup>a</sup>                         |             |
|                                                                          | HR <sup>b</sup>                                    | 95% CI      |
| History of mental disorder in household member before birth of the child |                                                    |             |
| No                                                                       | 1.00                                               |             |
| Yes                                                                      | 1.20                                               | (1.18-1.22) |
| Mental disorder in household member from birth to age <1 year            |                                                    |             |
| No                                                                       | 1.00                                               |             |
| Yes                                                                      | 1.15                                               | (1.13-1.17) |
| Mental disorder in household member from age 1 - < 5 years               |                                                    |             |
| No                                                                       | 1.00                                               |             |
| Yes                                                                      | 1.15                                               | (1.09-1.20) |
| Mental disorder in household member from age 5 - < 8 years               |                                                    |             |
| No                                                                       | 1.00                                               |             |
| Yes                                                                      | 1.12                                               | (1.05-1.21) |
| Mental disorder in household member from age 8 - < 12 years              |                                                    |             |
| No                                                                       | 1.00                                               |             |
| Yes                                                                      | 1.16                                               | (0.97-1.38) |

<sup>a</sup> adjusted for Townsend deprivation quintile, sex, maternal age at childbirth, gestational age at birth, small for gestational age (<10<sup>th</sup> centile), breastfeeding at 6-8 weeks, parity, multiple births, congenital anomalies, maternal cigarette smoking at booking in for pregnancy; <sup>b</sup> hazard ratio.

|                                                                                  | First all-cause<br>emergency hospital<br>admission |             |
|----------------------------------------------------------------------------------|----------------------------------------------------|-------------|
|                                                                                  | Multivariable <sup>a</sup>                         |             |
|                                                                                  | HR <sup>b</sup>                                    | 95% CI      |
| Alcohol related hospital admission in household member from birth to age <1 year |                                                    |             |
| No                                                                               | 1.00                                               |             |
| Yes                                                                              | 1.00                                               | (0.89-1.11) |
| Alcohol related hospital admission in household member from age 1 - < 5 years    |                                                    |             |
| No                                                                               | 1.00                                               |             |
| Yes                                                                              | 1.09                                               | (0.93-1.27) |
| Alcohol related hospital admission in household member from age 5 - < 8 years    |                                                    |             |
| No                                                                               | 1.00                                               |             |
| Yes                                                                              | 1.03                                               | (0.85-1.25) |
| Alcohol related hospital admission in household member from age 8 - < 12 years   |                                                    |             |
| No                                                                               | 1.00                                               |             |
| Yes                                                                              | 1.13                                               | (0.78-1.65) |

<sup>a</sup> adjusted for Townsend deprivation quintile, sex, maternal age at childbirth, gestational age at birth, small for gestational age (<10<sup>th</sup> centile), breastfeeding at 6-8 weeks, parity, multiple births, congenital anomalies, maternal cigarette smoking at booking in for pregnancy; <sup>b</sup> hazard ratio.

**Supplementary table 5: Regression results from Cox models for time to first emergency hospital admission associated with common mental and psychotic disorders.**

|                                                                                                                                                                                                                                                                                                                                                                                                                                                                                                                             | First all-cause emergency hospital admission |             | First injury or external cause emergency hospital admission |             | First child victimisation hospital admission |             |
|-----------------------------------------------------------------------------------------------------------------------------------------------------------------------------------------------------------------------------------------------------------------------------------------------------------------------------------------------------------------------------------------------------------------------------------------------------------------------------------------------------------------------------|----------------------------------------------|-------------|-------------------------------------------------------------|-------------|----------------------------------------------|-------------|
|                                                                                                                                                                                                                                                                                                                                                                                                                                                                                                                             | Multivariable <sup>a</sup>                   |             | Multivariable <sup>a</sup>                                  |             | Multivariable <sup>a</sup>                   |             |
|                                                                                                                                                                                                                                                                                                                                                                                                                                                                                                                             | HR <sup>b</sup>                              | 95% CI      | HR <sup>b</sup>                                             | 95% CI      | HR <sup>b</sup>                              | 95% CI      |
| Household member ever had a common mental disorder GP code:                                                                                                                                                                                                                                                                                                                                                                                                                                                                 |                                              |             |                                                             |             |                                              |             |
| for child pre-birth - 12 years.                                                                                                                                                                                                                                                                                                                                                                                                                                                                                             |                                              |             |                                                             |             |                                              |             |
| No                                                                                                                                                                                                                                                                                                                                                                                                                                                                                                                          | 1.00                                         |             | 1.00                                                        |             | 1.00                                         |             |
| Yes                                                                                                                                                                                                                                                                                                                                                                                                                                                                                                                         | 1.17                                         | (1.16–1.19) | 1.14                                                        | (1.11–1.18) | 1.52                                         | (1.41–1.64) |
| Household member ever had a psychosis GP code:                                                                                                                                                                                                                                                                                                                                                                                                                                                                              |                                              |             |                                                             |             |                                              |             |
| for child pre-birth - 12 years.                                                                                                                                                                                                                                                                                                                                                                                                                                                                                             |                                              |             |                                                             |             |                                              |             |
| No                                                                                                                                                                                                                                                                                                                                                                                                                                                                                                                          | 1.00                                         |             | 1.00                                                        |             | 1.00                                         |             |
| Yes                                                                                                                                                                                                                                                                                                                                                                                                                                                                                                                         | 0.99                                         | (0.93–1.06) | 1.08                                                        | (0.95–1.24) | 1.78                                         | (1.37–2.32) |
| <sup>a</sup> adjusted for ever any household member with an alcohol-related hospital admission, ever in a single adult household, deprivation quintile at birth/first 4 months, sex, maternal age at childbirth, gestational age at birth, small for gestational age (<10 <sup>th</sup> centile for gestation and gender-specific birthweight), breastfeeding at birth / 6-8 weeks, parity, multiple births (e.g. twins), congenital anomalies, maternal cigarette smoking at booking for birth; <sup>b</sup> hazard ratio. |                                              |             |                                                             |             |                                              |             |
